# Supplementary material for: Transplantation of intestinal organoids into a mouse model of colitis
Source: Springer Nature journal article supplement (doi:10.1038/s41596-021-00658-3), 2022-02-02
Supplement: MOESM3 [file 41596_2021_658_MOESM3_ESM22.xlsx]

## Sheet: Cohorts
	Recipients	Total	Positive	Operator	Gender of recipient animals	Success ratio	Donor Cell	derived region of organoids	Duration of organoid culture	Matrix used for organoids culture	Factors	Resource	DOI of resource
#1	RAG2-/-	3	1	#1	♂	0.333333	GFP tg	colon	Primary	Type I collagen	ENRW	Yui S. et al, Nature Medicine, 2012	https://doi.org/10.1038/nm.2695
#2	RAG2-/-	5	3	#1	♂	0.6	GFP tg	colon	Primary	Type I collagen	ENRW	Yui S. et al, Nature Medicine, 2012	https://doi.org/10.1038/nm.2695
#3	RAG2-/-	5	1	#1	♀	0.2	GFP tg	colon	Primary	Type I collagen	ENRW	Yui S. et al, Nature Medicine, 2012	https://doi.org/10.1038/nm.2695
#4	RAG2-/-	10	1	#1	♀	0.1	RFP	colon, expanded from a single Lgr5+ stem cells	≈3 months	Type I collagen (initiated in Matrigel)	ENRW	Yui S. et al, Nature Medicine, 2012	https://doi.org/10.1038/nm.2695
#5	RAG2-/-	6	3	#1	♀	0.5	RFP	colon, expanded from a single Lgr5+ stem cells	≈3 months	Type I collagen (initiated in Matrigel)	ENRW	Yui S. et al, Nature Medicine, 2012	https://doi.org/10.1038/nm.2695
#6	RAG2-/-	5	4	#1	♀	0.8	GFP tg, FEnS	Proximal part of fetal intestine (E16.5)	>3 months	Matrigel	ENR	Fordham R. et al, Cell Stem Cell, 2013	https://doi.org/10.1016/j.stem.2013.09.015
#7	RAG2-/-	10	8	#1	♂	0.8	GFP tg, FEnS	Proximal part of fetal intestine (E16.5)	>3 months	Matrigel	ENR	Fordham R. et al, Cell Stem Cell, 2013	https://doi.org/10.1016/j.stem.2013.09.015
#8	RAG2-/-	5	3	#1	♂	0.6	GFP tg, FEnS	Proximal part of fetal intestine (E16.5)	>3 months	Matrigel	ENR	Fordham R. et al, Cell Stem Cell, 2013	https://doi.org/10.1016/j.stem.2013.09.015
#9	RAG2-/-	14	7	#1	♂	0.5	GFP tg	colon	Primary	Type I collagen	ENRW	This paper
#10	RAG2-/-	10	3	#1	♀	0.3	GFP tg	colon	Primary	Type I collagen	ENRW	This paper
#11	RAG2-/-	6	4	#1	♂	0.666667	mTmG	colon	Passage 3	Matrigel	RC	This paper
#12	RAG2-/-	4	3	#1	♀	0.75	mTmG	Proximal small intestine	Passage 3	Matrigel	ENR	Yui S. et al, Cell Stem Cell, 2018	https://doi.org/10.1016/j.stem.2017.11.001
#13	RAG2-/-	6	3	#1	♂	0.5	mTmG	Proximal small intestine	Passage 3	Matrigel	ENRW	Yui S. et al, Cell Stem Cell, 2018	https://doi.org/10.1016/j.stem.2017.11.001
#14	RAG2-/-	5	3	#1	♂	0.6	mTmG	Proximal small intestine	Passage 3	Type I collagen	ENRW	Yui S. et al, Cell Stem Cell, 2018	https://doi.org/10.1016/j.stem.2017.11.001
#15	RAG2-/-	5	5	#1	♀	1	mTmG, FEnS	Proximal small intestine, expanded from sorted CD44+ fraction	≈2 months	Matrigel	ENRW	Guiu J. et al, Nature, 2019	https://doi.org/10.1038/s41586-019-1212-5
#16	RAG2-/-	6	4	#1	♂	0.666667	mTmG, FEnS	Proximal small intestine, expanded from sorted CD44- fraction	≈2 months	Matrigel	ENRW	Guiu J. et al, Nature, 2019	https://doi.org/10.1038/s41586-019-1212-5
#17	C57BL/6J	10	2	#1	♂	0.2	GFP tg	colon	Passage 3	Matrigel	RC	This paper
#18	C57BL/6J	5	2	#1	♀	0.4	GFP tg	colon	Passage 3	Matrigel	RC	This paper
#19	C57BL/6J	10	5	#1	♂	0.5	GFP tg	colon	Passage 3	Matrigel	RC	This paper
#20	C57BL/6J	10	4	#1	♀	0.4	GFP tg	colon	Passage 3	Matrigel	RC	This paper
#21	C57BL/6J	5	1	#2	♂	0.2	mTmG	Distal part of small intestine	Passage 3	Matrigel	ENRW	This paper
#22	C57BL/6J	5	1	#2	♀	0.2	mTmG	Distal part of small intestine	Passage 3	Type I Collagen	ENRW	This paper
#23	C57BL/6J	14	5	#2	♀	0.357143	mTmG	Proximal part of fetal intestine (E16.5)	Passage 3	Matrigel	ENR	This paper
#24	C57BL/6J	8	4	#2	♂	0.5	GFP labelling by lentivirus	colon	> 3 months	Matrigel	MG-RC	This paper

## Sheet: Organoids size
Fragments		Colon, MG-RC		Colon, COL-ENRW		SI, MG-ENR		SI, MG-ENRWN		SI, COL-TDU
No	Measure (µm)	No	Measure (µm)	No	Measure (µm)	No	Measure (µm)	No	Measure (µm)	No	Measure (µm)
Median	83		193.5		176	Median	220.5		215		250
Average	102.26		218.77		194.22	Average	242.64		224.56		337.61
1	237	1	498	1	561	1	264	1	390	1	894
2	68	2	360	2	278	2	172	2	257	2	835
3	38	3	193	3	405	3	254	3	212	3	1014
4	153	4	240	4	370	4	122	4	566	4	461
5	68	5	274	5	129	5	114	5	405	5	573
6	75	6	610	6	224	6	162	6	287	6	230
7	91	7	251	7	286	7	267	7	198	7	376
8	45	8	376	8	319	8	159	8	287	8	142
9	61	9	193	9	346	9	222	9	181	9	156
10	53	10	178	10	117	10	325	10	151	10	122
11	75	11	263	11	219	11	362	11	370	11	393
12	242	12	148	12	446	12	237	12	255	12	564
13	83	13	145	13	203	13	367	13	144	13	695
14	43	14	264	14	400	14	369	14	323	14	361
15	242	15	249	15	174	15	236	15	205	15	578
16	86	16	258	16	186	16	250	16	154	16	205
17	60	17	465	17	150	17	129	17	287	17	149
18	78	18	323	18	162	18	356	18	427	18	113
19	31	19	378	19	221	19	146	19	292	19	145
20	290	20	211	20	126	20	524	20	339	20	299
21	160	21	599	21	179	21	415	21	91	21	245
22	181	22	365	22	203	22	521	22	129	22	822
23	196	23	215	23	179	23	288	23	106	23	219
24	103	24	181	24	262	24	361	24	161	24	214
25	68	25	382	25	129	25	302	25	225	25	363
26	74	26	294	26	159	26	268	26	253	26	291
27	77	27	189	27	160	27	391	27	106	27	139
28	174	28	223	28	250	28	390	28	177	28	571
29	117	29	181	29	196	29	192	29	277	29	800
30	86	30	153	30	143	30	319	30	151	30	271
31	170	31	123	31	106	31	237	31	233	31	841
32	76	32	251	32	176	32	344	32	239	32	612
33	206	33	213	33	139	33	374	33	389	33	971
34	91	34	315	34	153	34	315	34	299	34	468
35	68	35	240	35	399	35	260	35	355	35	236
36	64	36	359	36	294	36	374	36	215	36	198
37	53	37	225	37	320	37	262	37	122	37	289
38	108	38	162	38	144	38	394	38	319	38	249
39	48	39	272	39	263	39	375	39	166	39	146
40	153	40	446	40	222	40	480	40	251	40	574
41	45	41	219	41	199	41	328	41	88	41	566
42	53	42	168	42	274	42	204	42	267	42	200
43	70	43	124	43	280	43	341	43	150	43	143
44	61	44	159	44	181	44	310	44	205	44	552
45	112	45	103	45	190	45	218	45	279	45	422
46	79	46	166	46	115	46	257	46	204	46	302
47	68	47	304	47	129	47	254	47	204	47	432
48	78	48	139	48	106	48	159	48	143	48	428
49	65	49	364	49	240	49	382	49	317	49	369
50	91	50	355	50	214	50	168	50	159	50	295
51	77	51	177	51	227	51	359	51	107	51	282
52	242	52	91	52	107	52	204	52	183	52	519
53	212	53	176	53	135	53	172	53	268	53	251
54	115	54	147	54	152	54	264	54	223	54	284
55	204	55	139	55	134	55	349	55	370	55	651
56	72	56	243	56	206	56	212	56	144	56	961
57	64	57	174	57	310	57	204	57	174	57	400
58	83	58	153	58	401	58	316	58	237	58	235
59	136	59	139	59	151	59	242	59	130	59	475
60	98	60	98	60	169	60	117	60	172	60	189
61	114	61	92	61	135	61	128	61	318	61	174
62	80	62	129	62	155	62	136	62	219	62	489
63	117	63	122	63	196	63	132	63	218	63	356
64	82	64	235	64	121	64	389	64	184	64	740
65	88	65	159	65	83	65	154	65	139	65	720
66	119	66	235	66	91	66	239	66	205	66	409
67	274	67	185	67	198	67	159	67	156	67	206
68	70	68	118	68	108	68	115	68	353	68	331
69	48	69	209	69	59	69	126	69	160	69	172
70	78	70	153	70	208	70	184	70	240	70	163
71	64	71	174	71	98	71	126	71	98	71	560
72	145	72	194	72	144	72	124	72	264	72	118
73	86	73	95	73	134	73	184	73	283	73	136
74	53	74	222	74	187	74	274	74	128	74	156
75	101	75	132	75	122	75	348	75	215	75	132
76	68	76	105	76	224	76	189	76	227	76	151
77	77	77	205	77	205	77	218	77	126	77	92
78	74	78	178	78	153	78	382	78	408	78	374
79	129	79	203	79	207	79	93	79	98	79	377
80	68	80	75	80	98	80	187	80	118	80	398
81	114	81	139	81	96	81	128	81	402	81	103
82	84	82	177	82	98	82	166	82	263	82	145
83	64	83	163	83	119	83	183	83	177	83	184
84	88	84	77	84	91	84	170	84	272	84	126
85	68	85	212	85	191	85	130	85	207	85	88
86	193	86	246	86	176	86	106	86	292	86	127
87	93	87	356	87	138	87	216	87	265	87	175
88	93	88	83	88	177	88	192	88	320	88	180
89	101	89	219	89	226	89	159	89	121	89	128
90	101	90	98	90	113	90	129	90	251	90	75
91	83	91	213	91	128	91	155	91	199	91	68
92	91	92	150	92	68	92	219	92	98	92	124
93	45	93	213	93	98	93	241	93	129	93	149
94	115	94	101	94	171	94	199	94	142	94	98
95	83	95	170	95	139	95	134	95	134	95	172
96	209	96	301	96	210	96	163	96	91	96	101
97	64	97	139	97	370	97	241	97	274	97	70
98	76	98	280	98	296	98	206	98	217	98	208
99	45	99	143	99	166	99	168	99	205	99	168
100	64	100	274	100	107	100	113	100	222	100	238

## Sheet: Area of engraftments
	Recipients	Donor	Origin	Duration of culture	ECM/Medium	Area(µm2)	Resource	Analysis timing
#1	RAG2	GFP tg	Colon	Primary	COL-ENRW	3601710	Yui, S. et al, Nat. Med, 2012	4 weeks
#2	RAG2	GFP tg	Colon	Primary	COL-ENRW	857091	Yui, S. et al, Nat. Med, 2012	4 weeks
#3	RAG2	GFP tg	Colon	Primary	COL-ENRW	309299	Yui, S. et al, Nat. Med, 2012	4 weeks
#4	RAG2	GFP tg	Colon	Primary	COL-ENRW	277168	Yui, S. et al, Nat. Med, 2012	4 weeks
#5	RAG2	GFP tg	Colon	Primary	COL-ENRW	213278	Yui, S. et al, Nat. Med, 2012	4 weeks
#6	RAG2	RFP	Colon	≈ 3months	COL, ENRW	5711344	Yui, S. et al, Nat. Med, 2012	4 weeks
#7	RAG2	RFP	Colon	≈ 3months	COL, ENRW	143082	Yui, S. et al, Nat. Med, 2012	4 weeks
#8	RAG2	RFP	Colon	≈ 3months	COL, ENRW	7168355	Yui, S. et al, Nat. Med, 2012	17 weeks
#9	RAG2	RFP	Colon	≈ 3months	COL, ENRW	3968719	Yui, S. et al, Nat. Med, 2012	21 weeks
#10	RAG2	mTmG	Colon	P3	MG-RC	4320000	This paper	2 weeks
#11	RAG2	mTmG	Colon	P3	MG-RC	869000	This paper	2 weeks
#12	RAG2	mTmG	Colon	P3	MG-RC	1940000	This paper	2 weeks
#13	RAG2	mTmG	Colon	P3	MG-RC	3.77551e+06	This paper	2 weeks
#14	RAG2	mTmG	Small intestine	P3	MG-ENR	357000	This paper	2 weeks
#15	RAG2	mTmG	Small intestine	P3	MG-ENR	377000	This paper	2 weeks
#16	RAG2	mTmG	Small intestine	P3	MG-ENR	166000	This paper	2 weeks
#17	RAG2	mTmG	Small intestine	P3	MG-ENR	119000	This paper	2 weeks
#18	RAG2	mTmG	Small intestine	P3	MG-ENRW	1624000	This paper	2 weeks
#19	RAG2	mTmG	Small intestine	P3	MG-ENRW	291000	This paper	2 weeks
#20	RAG2	mTmG	Small intestine	P3	MG-ENRW	1959000	This paper	2 weeks
#21	RAG2	mTmG	Small intestine	P3	COL-ENRW	173682	This paper	2 weeks
#22	RAG2	mTmG	Small intestine	P3	COL-ENRW	174514	This paper	2 weeks
#23	RAG2	mTmG	Small intestine	P3	COL-ENRW	2811054	This paper	2 weeks
#24	WT	GFP tg	Colon	Primary	Type IA	755822	This paper	2 weeks
#25	WT	GFP tg	Colon	Primary	MG-RC	1921286	This paper	2 weeks
#26	WT	GFP tg	Colon	Primary	MG-RC	1257231	This paper	2 weeks
#27	WT	GFP tg	Colon	Primary	MG-RC	2469981	This paper	2 weeks
#28	WT	GFP lenti	Colon	> 3months	MG-RC	54000	This paper	2 weeks
#29	WT	GFP lenti	Colon	> 3months	MG-RC	144000	This paper	2 weeks
#30	WT	GFP lenti	Colon	> 3months	MG-RC	8000	This paper	2 weeks
#31	WT	GFP lenti	Colon	> 3months	MG-RC	566000	This paper	2 weeks
#32	WT	mTmG	Small intestine	P3	MG-ENR	219000	This paper	2 weeks
#33	WT	mTmG	Small intestine	P3	MG-ENR	48000	This paper	2 weeks
#34	WT	mTmG	Small intestine	P3	MG-ENRW	732782	This paper	2 weeks
#35	WT	mTmG	Small intestine	P3	MG-ENRW	176000	This paper	2 weeks
#36	WT	mTmG	Small intestine	P3	MG-ENRW	116000	This paper	2 weeks
#37	WT	mTmG	Small intestine	P3	MG-ENRW	695000	This paper	2 weeks
#38	WT	mTmG	Small intestine	P3	MG-ENRW	259000	This paper	2 weeks
#39	WT	mTmG	Small intestine	P3	MG-ENRW	59000	This paper	2 weeks
#40	WT	mTmG	Small intestine	P3	COL-ENRW	94000	This paper	2 weeks
#41	WT	mTmG	Small intestine	P3	COL-ENRW	34000	This paper	2 weeks
#42	WT	mTmG	Small intestine	P3	COL-ENRW	191000	This paper	2 weeks
#43	WT	mTmG	Small intestine	P3	COL-ENRW	123000	This paper	2 weeks
